# Supplementary material
Source: publisher site journal article supplement (https://www.dovepress.com/article/589951)
Supplement: Supplementary file 1 [file 589951%20Revised%20Supplementary%20Table%201.pdf]

Supplementary Table 1. Raw data of multivariate analysis

| Cases    | Fever | Nephrostomy tub | Ureteral stents | Foley catheters | Hemoglobin | Urine nitrite(+) | Group |
|----------|-------|-----------------|-----------------|-----------------|------------|------------------|-------|
| 10243568 | 0     | 0               | 0               | 0               | 128        | 0                | 0     |
| 10239860 | 0     | 0               | 0               | 0               | 100        | 1                | 0     |
| 10002411 | 0     | 0               | 0               | 0               | 118        | 0                | 0     |
| 10239682 | 0     | 0               | 0               | 0               | 113        | 1                | 0     |
| 10267978 | 0     | 0               | 0               | 0               | 132        | 0                | 0     |
| 10263797 | 0     | 0               | 0               | 0               | 161        | 0                | 0     |
| 10268675 | 0     | 0               | 0               | 0               | 130        | 0                | 0     |
| 10242022 | 0     | 0               | 0               | 0               | 149        | 0                | 0     |
| 10288609 | 1     | 0               | 0               | 0               | 141        | 0                | 0     |
| 10283211 | 0     | 0               | 0               | 0               | 129        | 1                | 0     |
| 10280393 | 1     | 0               | 0               | 0               | 107        | 1                | 0     |
| 10107565 | 0     | 0               | 0               | 0               | 108        | 0                | 0     |
| 10291202 | 0     | 0               | 0               | 0               | 134        | 0                | 0     |
| 10290965 | 0     | 0               | 0               | 0               | 130        | 0                | 0     |
| 10289844 | 1     | 0               | 0               | 0               | 104        | 0                | 0     |
| 10294686 | 0     | 0               | 0               | 0               | 88         | 0                | 0     |
| 10315522 | 0     | 0               | 0               | 0               | 152        | 0                | 0     |
| 10293592 | 0     | 0               | 0               | 0               | 148        | 0                | 0     |
| 10316802 | 0     | 0               | 0               | 1               | 114        | 0                | 0     |
| 10015104 | 0     | 0               | 0               | 0               | 170        | 0                | 0     |
| 10314385 | 0     | 0               | 0               | 0               | 149        | 0                | 0     |
| 10311543 | 0     | 0               | 0               | 0               | 95         | 0                | 0     |
| 10313927 | 1     | 0               | 0               | 0               | 104        | 0                | 0     |
| 10291005 | 1     | 0               | 0               | 0               | 129        | 0                | 0     |
| 10367805 | 0     | 0               | 0               | 0               | 145        | 0                | 0     |
| 10365819 | 0     | 0               | 0               | 0               | 161        | 0                | 0     |
| 10374365 | 0     | 0               | 0               | 0               | 140        | 0                | 0     |
| 10367434 | 0     | 0               | 0               | 0               | 149        | 0                | 0     |
| 10396568 | 0     | 0               | 0               | 0               | 121        | 0                | 0     |
| 10387767 | 1     | 0               | 0               | 0               | 115        | 1                | 0     |
| 10383743 | 0     | 0               | 0               | 0               | 105        | 0                | 0     |
| 10070797 | 0     | 0               | 0               | 0               | 151        | 0                | 0     |
| 10405142 | 0     | 0               | 0               | 0               | 93         | 1                | 0     |
| 10026863 | 0     | 0               | 0               | 0               | 129        | 0                | 0     |
| 10396586 | 0     | 0               | 0               | 0               | 149        | 0                | 0     |
| 10405014 | 0     | 0               | 0               | 0               | 146        | 0                | 0     |
| 10458534 | 0     | 0               | 0               | 0               | 131        | 0                | 0     |
| 10450677 | 0     | 0               | 0               | 0               | 157        | 0                | 0     |
| 10447126 | 1     | 0               | 0               | 0               | 150        | 0                | 0     |
| 10456062 | 1     | 0               | 0               | 0               | 101        | 0                | 0     |
| 10468815 | 0     | 0               | 0               | 0               | 111        | 0                | 0     |
| 10462350 | 0     | 0               | 0               | 0               | 91         | 0                | 0     |
| 10460454 | 0     | 0               | 0               | 0               | 121        | 0                | 0     |
| 10469095 | 1     | 0               | 0               | 0               | 123        | 1                | 0     |
| 10484947 | 0     | 0               | 0               | 0               | 137        | 0                | 0     |
| 10483069 | 1     | 0               | 0               | 0               | 98         | 1                | 0     |
| 10480713 | 0     | 0               | 0               | 0               | 170        | 1                | 0     |
| 10483584 | 1     | 0               | 0               | 0               | 137        | 1                | 0     |
| 10538650 | 0     | 0               | 0               | 0               | 139        | 1                | 0     |
| 10530700 | 0     | 0               | 0               | 1               | 103        | 1                | 0     |
| 10535025 | 0     | 0               | 0               | 0               | 152        | 0                | 0     |
| 10533152 | 0     | 1               | 0               | 0               | 123        | 1                | 0     |
| 10546912 | 1     | 0               | 0               | 0               | 116        | 1                | 0     |
| 10543161 | 0     | 0               | 0               | 0               | 154        | 0                | 0     |
| 10544095 | 0     | 1               | 0               | 0               | 134        | 1                | 0     |
| 10548892 | 0     | 0               | 0               | 0               | 126        | 0                | 0     |

|          |   |   |   |   |     |   |   |
|----------|---|---|---|---|-----|---|---|
| 10715992 | 0 | 0 | 0 | 0 | 107 | 0 | 0 |
| 10154196 | 1 | 0 | 0 | 0 | 127 | 0 | 0 |
| 10710933 | 0 | 0 | 1 | 0 | 140 | 0 | 0 |
| 10458487 | 0 | 0 | 0 | 0 | 121 | 1 | 0 |
| 10713101 | 0 | 0 | 0 | 0 | 135 | 0 | 0 |
| 10690501 | 0 | 0 | 0 | 0 | 137 | 1 | 0 |
| 10696303 | 1 | 0 | 1 | 0 | 131 | 0 | 0 |
| 10689321 | 0 | 0 | 0 | 0 | 126 | 0 | 0 |
| 10872136 | 0 | 0 | 0 | 0 | 174 | 0 | 0 |
| 10872297 | 0 | 0 | 0 | 0 | 166 | 0 | 0 |
| 10872139 | 0 | 0 | 0 | 0 | 94  | 0 | 0 |
| 10878307 | 0 | 0 | 0 | 0 | 119 | 0 | 0 |
| 10865545 | 0 | 0 | 0 | 0 | 156 | 0 | 0 |
| 10881402 | 0 | 0 | 0 | 0 | 122 | 0 | 0 |
| 10878415 | 0 | 0 | 0 | 0 | 163 | 0 | 0 |
| 10422905 | 0 | 0 | 0 | 0 | 71  | 0 | 0 |
| 10918511 | 0 | 0 | 0 | 0 | 143 | 0 | 0 |
| 10092532 | 0 | 0 | 0 | 0 | 135 | 0 | 0 |
| 10618952 | 0 | 0 | 0 | 0 | 132 | 1 | 0 |
| 10911741 | 0 | 0 | 0 | 0 | 157 | 0 | 0 |
| 11138748 | 0 | 0 | 0 | 0 | 134 | 0 | 0 |
| 11149667 | 0 | 0 | 0 | 0 | 153 | 0 | 0 |
| 10818997 | 0 | 0 | 0 | 0 | 128 | 0 | 0 |
| 10131804 | 0 | 0 | 0 | 0 | 141 | 0 | 0 |
| 11263419 | 0 | 0 | 0 | 0 | 133 | 1 | 0 |
| 11262759 | 0 | 0 | 0 | 0 | 116 | 0 | 0 |
| 11262908 | 0 | 0 | 0 | 0 | 134 | 0 | 0 |
| 11257622 | 1 | 1 | 0 | 0 | 73  | 1 | 0 |
| 11299202 | 1 | 0 | 0 | 0 | 102 | 1 | 0 |
| 10363433 | 0 | 0 | 0 | 0 | 151 | 0 | 0 |
| 11304400 | 0 | 0 | 0 | 0 | 150 | 0 | 0 |
| 11299141 | 0 | 0 | 0 | 0 | 167 | 0 | 0 |
| 11304449 | 0 | 0 | 1 | 0 | 103 | 1 | 0 |
| 11311826 | 0 | 0 | 0 | 0 | 128 | 0 | 0 |
| 11304229 | 0 | 0 | 0 | 0 | 140 | 1 | 0 |
| 11303374 | 0 | 0 | 0 | 0 | 92  | 0 | 0 |
| 11334894 | 0 | 0 | 0 | 0 | 143 | 0 | 0 |
| 11340114 | 0 | 0 | 0 | 0 | 121 | 1 | 0 |
| 10083057 | 0 | 0 | 0 | 0 | 135 | 0 | 0 |
| 10940341 | 0 | 0 | 0 | 0 | 124 | 0 | 0 |
| 11334517 | 0 | 0 | 0 | 0 | 141 | 0 | 0 |
| 11331663 | 0 | 0 | 0 | 0 | 147 | 1 | 0 |
| 11339003 | 0 | 0 | 0 | 0 | 148 | 0 | 0 |
| 11333781 | 0 | 0 | 0 | 0 | 153 | 0 | 0 |
| 11329248 | 0 | 0 | 0 | 0 | 142 | 0 | 0 |
| 11342393 | 1 | 0 | 0 | 0 | 95  | 0 | 0 |
| 11338167 | 1 | 0 | 0 | 0 | 100 | 1 | 0 |
| 11276174 | 0 | 0 | 0 | 0 | 108 | 0 | 0 |
| 11327949 | 0 | 0 | 0 | 0 | 147 | 0 | 0 |
| 11341476 | 0 | 0 | 0 | 0 | 157 | 0 | 0 |
| 10083190 | 0 | 0 | 1 | 0 | 123 | 0 | 0 |
| 11333779 | 0 | 0 | 0 | 0 | 144 | 0 | 0 |
| 11358430 | 0 | 0 | 0 | 0 | 115 | 1 | 0 |
| 11355422 | 0 | 0 | 0 | 0 | 151 | 0 | 0 |
| 11352403 | 0 | 0 | 0 | 0 | 127 | 1 | 0 |
| 11352483 | 0 | 0 | 0 | 0 | 116 | 1 | 0 |
| 10697827 | 0 | 0 | 0 | 0 | 136 | 0 | 0 |
| 11342478 | 0 | 0 | 0 | 0 | 134 | 1 | 0 |

|          |   |   |   |   |     |   |   |
|----------|---|---|---|---|-----|---|---|
| 11347028 | 1 | 1 | 0 | 1 | 137 | 0 | 0 |
| 11348835 | 1 | 0 | 1 | 1 | 105 | 0 | 0 |
| 11373030 | 1 | 0 | 1 | 1 | 93  | 1 | 0 |
| 11374436 | 0 | 0 | 0 | 0 | 139 | 1 | 0 |
| 11376389 | 0 | 0 | 1 | 0 | 132 | 0 | 0 |
| 11378801 | 0 | 0 | 0 | 0 | 130 | 0 | 0 |
| 11378313 | 0 | 0 | 0 | 0 | 163 | 0 | 0 |
| 10086150 | 0 | 0 | 0 | 0 | 140 | 0 | 0 |
| 11373030 | 0 | 0 | 1 | 1 | 93  | 1 | 0 |
| 11377486 | 0 | 0 | 0 | 0 | 149 | 0 | 0 |
| 10235691 | 0 | 0 | 0 | 0 | 128 | 1 | 1 |
| 10293472 | 0 | 0 | 0 | 0 | 101 | 1 | 1 |
| 10268651 | 1 | 0 | 0 | 0 | 117 | 0 | 1 |
| 10315619 | 1 | 0 | 1 | 1 | 71  | 0 | 1 |
| 10371297 | 0 | 1 | 1 | 1 | 141 | 1 | 1 |
| 10406891 | 1 | 0 | 0 | 0 | 157 | 1 | 1 |
| 10451743 | 1 | 0 | 0 | 0 | 97  | 1 | 1 |
| 10469167 | 0 | 0 | 1 | 0 | 128 | 1 | 1 |
| 10538602 | 1 | 1 | 1 | 0 | 119 | 1 | 1 |
| 10542662 | 0 | 0 | 0 | 0 | 121 | 1 | 1 |
| 11283323 | 0 | 1 | 1 | 0 | 90  | 1 | 1 |
| 11237784 | 0 | 0 | 1 | 0 | 95  | 1 | 1 |
| 11131933 | 1 | 0 | 1 | 0 | 124 | 0 | 1 |
| 11332560 | 0 | 0 | 0 | 0 | 168 | 0 | 1 |
| 11375870 | 0 | 0 | 0 | 0 | 130 | 0 | 1 |
| 10290433 | 1 | 0 | 1 | 0 | 115 | 1 | 1 |
| 10310586 | 0 | 0 | 0 | 0 | 129 | 1 | 1 |
| 10389942 | 1 | 0 | 1 | 0 | 108 | 1 | 1 |
| 10484779 | 1 | 1 | 0 | 0 | 125 | 1 | 1 |
| 10716931 | 1 | 0 | 0 | 0 | 133 | 0 | 1 |
| 10872331 | 1 | 0 | 1 | 1 | 109 | 0 | 1 |
| 10879704 | 0 | 0 | 0 | 0 | 142 | 1 | 1 |
| 10919093 | 0 | 0 | 1 | 1 | 95  | 0 | 1 |
| 11312555 | 1 | 0 | 1 | 0 | 116 | 0 | 1 |
| 11330514 | 0 | 0 | 0 | 0 | 123 | 0 | 1 |
| 11331678 | 0 | 0 | 0 | 0 | 108 | 0 | 1 |
| 11342507 | 1 | 0 | 1 | 0 | 99  | 1 | 1 |
| 10624103 | 1 | 0 | 1 | 0 | 121 | 0 | 1 |
| 10698987 | 1 | 0 | 0 | 0 | 113 | 1 | 1 |
| 11355971 | 1 | 0 | 1 | 1 | 124 | 1 | 1 |
| 11382092 | 1 | 0 | 1 | 0 | 82  | 0 | 1 |

---
